# Supplementary material for: Pituitary Adenylate Cyclase Activating Polypeptide (PACAP) Signalling Exerts Chondrogenesis Promoting and Protecting Effects: Implication of Calcineurin as a Downstream Target
Source: PubMed Central journal article supplement (PMC3958376; doi:10.1371/journal.pone.0091541), 2014-03-18
Supplement: pone.0091541.s001.pdf [file pone.0091541.s001.pdf]

## Metachromasia, day 6

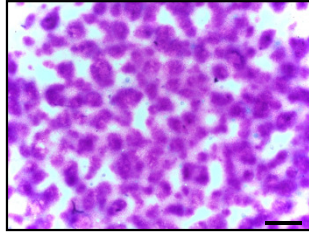

Control  
(OD<sub>625</sub>=100%)

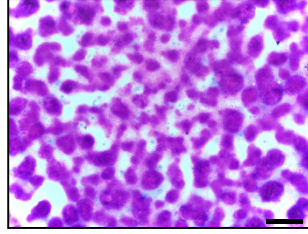

PACAP 1-38 10 μM  
(OD<sub>625</sub>=126%\*)

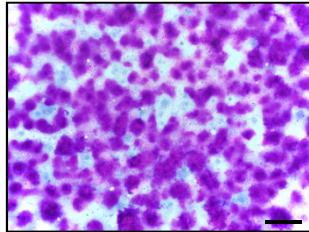

PACAP 6-38 100 nM  
(OD<sub>625</sub>=103%)

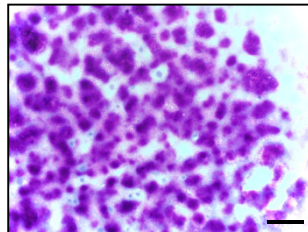

PACAP 6-38 1 μM  
(OD<sub>625</sub>=102%)
